# Quality of life of people seeking for acupuncture treatment

Reginaldo Silva-Filho<sup>1\*</sup>, Marcia Kiyomi Koike<sup>2</sup>, Gizelda Monteiro da Silva<sup>3</sup>

<sup>1</sup> Academia Brasileira de Estudos em Medicina Chinesa, Faculdade EBRAMEC and Programa de Pós-Graduação em Ciências da Saúde - Instituto de Assistência Médica do Servidor Público Estadual - IAMSPE; [regis@ebramec.edu.br](mailto:regis@ebramec.edu.br)

<sup>2</sup> Programa de Pós-Graduação em Ciências da Saúde - Instituto de Assistência Médica do Servidor Público Estadual - IAMSPE and Department of Emergency Medicine - University of São Paulo - [mkkoike17@gmail.com](mailto:mkkoike17@gmail.com)

<sup>3</sup> Programa de Pós-Graduação em Ciências da Saúde - Instituto de Assistência Médica do Servidor Público Estadual - IAMSPE; [gizeldamonteiro@uol.com.br](mailto:gizeldamonteiro@uol.com.br)

\* Correspondence: [regis@ebramec.edu.br](mailto:regis@ebramec.edu.br)

**Author Contributions:** All authors contributed to the present paper and are equally responsible for the information presented. During different phases of the study each author had a prevalent position: “Conceptualization, RSF and GMS; methodology, RSF and GMS; formal analysis, GMS and MKK; investigation, RSF; data analysis, MKK; writing—original draft preparation, RSF and MKK; writing—review and editing, RSF, GMS and MKK.. All authors have read and agreed to the published version of the manuscript.”.

## Abstract:

**Background:** The use of Acupuncture, part of Chinese Medicine, has grown as well as the need to understand its effects. The Quality of Life (QOL) assessment is an important way to have a global view of the patient. **Objective:** To assess the QoL of people who seek acupuncture at the outpatient clinic of an acupuncture school. **Methods:** QOL assessment using WHOQOL-BREF applied only once to people who voluntarily sought for acupuncture at the general outpatient clinic of Faculdade EBRAMEC in 2016. **Results:** People who sought for acupuncture treatment presented lower mean QoL value in all domains compared to normative values for Brazil, with physical domain presenting lower values than the other domains. It was also observed that male patients had higher values in the physical, psychological domains and general QOL compared to women. **Conclusion:** Our data demonstrated that people seeking for acupuncture treatment presented lower values of QOL in comparison to a referential study with a Brazilian population, providing for the first time reference values measured by WHOQOL-bref, for patients seeking for acupuncture in the city of São Paulo.

**Keywords:** Quality of Life<sup>1</sup>; Acupuncture<sup>2</sup>; Chinese Medicine<sup>3</sup>.

## 1. Introduction

Chinese Medicine, a medical rationale [1] that has a history of more than 5000 years of practice, presents a peculiar way of understanding physiology and pathology of the human being [2], frequently through observations and connections related to external environment and the body, but also related to the connections of different parts of the body with each other and as a whole, concept that is described in the West as a holistic approach [3,4] As for

the treatments, Chinese Medicine offers different approaches: Acupuncture and Moxibustion; Chinese herbal medicine; Chinese diet therapy; Chinese massage therapy (Tui Na); Chinese Body Arts (Qi Gong and Tai ji Quan) [5].

Acupuncture has been part of the National Policy of “Integrative and Complementary Practices in Health” (PICS) since 2006 [6] and its use through Brazilian Unified Health System (SUS) has grown in the official data, presenting itself as one of the most used treatments among the PICS, second only to phytotherapy. Researchers identified that the use of acupuncture in SUS is still small compared to its use in the private health system [7].

The concept of “Quality of life” has been in use for the evaluation of therapeutic methods [8-12], including those identified as complementary, alternative or integrative [13-18], where acupuncture is part. World Health Organization (WHO) Quality of Life group defines it as “individuals’ perception of their position in life in the context of the culture and value systems in which they live and in relation to their goals, expectations, standards and concerns”[19]. This wider approach allows an improvement on the communication between patients and health professionals during the evaluation process, which leads to a gain in the identification and establishment of goals and priorities for the treatment [20-23].

There are different instruments translated, adapted and validated in Portuguese, including those developed and recommended by the WHO, such as World Health Organization Quality of Life Questionnaire 100 (WHOQOL-100), translated into at least 20 languages [24], and the World Health Organization Quality of Life Questionnaire - Bref (WHOQOL-BREF), a more practical and direct version, with the same characteristics [25,26].

Specifically to acupuncture, the use of “Quality of Life” assessment instruments has been frequent to compare its effects, however there is no reference or normative value for those who seek acupuncture treatment. In this sense, the present study aims to assess the quality of life of people seeking for acupuncture treatment in an outpatient clinic of an acupuncture school, in addition to presenting a description of the age and gender profile of people who seek for acupuncture treatment, and compare the quality of life indexes of these people with the normative data indexes of a Brazilian population.

## 2. Materials and Methods

This study was carried out through an observational, descriptive, transversal research with a quantitative approach, through WHOQOL-BREF instrument data evaluation after being applied to those who voluntarily sought for acupuncture treatment at the general outpatient clinic of the EBRAMEC College (Brazilian School of Chinese Medicine) and answered the instrument in a single moment - directly before the first appointment, during 2016.

WHOQOL-BREF [24], the selected instrument for this study, contains 4 domains and 26 questions, separated into physical, psychological, social, environmental, which application presented satisfactory psychometric properties of internal consistency, discriminant validity, criterion validity, concurrent validity and test-retest reliability.

Data collection started after being approved by the Research Ethics Committee of - Instituto de Assistência Médica do Servidor Público Estadual - IAMSPE, obtaining the Certificate of Presentation for Ethical Appreciation (CAAE): 61575916.1.0000.5463. Following all the guidelines and regulatory standards present in the Resolution of the National Health Council No. 466/2012.

Data were properly tabulated, evaluated and analyzed according to the recommendations of Brazilian WHOQOL Group, responsible for the translation, cultural adaptation and validation of WHOQOL-BREF in Portuguese language. Participants were divided into age groups according to the normative reference for the Brazilian population [27]: <20 years, ≥ 20 years and <30 years, ≥ 30 years and <45 years, ≥ 45 years and <65 years and ≥ 65 years.

Data obtained in the present study (Acupuncture Group) were also compared with the normative indexes of a Brazilian population using WHOQOL-BREF, according to the Brazilian WHOQOL Group (Brazil Group) [27] and

with the basic data of an older adults population (Porto Alegre Group) [28]. The surveyed variables were analyzed according to the recommendations of Brazilian WHOQOL Group [29].

For the Acupuncture Group, there were some criteria:

#### 2.1- Inclusion Criteria

- Patients of the general acupuncture clinic of Faculdade EBRAMEC;
- Being treated by acupuncture at least once on the previous mentioned clinic after answering the evaluation instrument.

#### 2.2- Exclusion Criteria

- Teachers, employees, and students of Faculdade EBRAMEC.

#### 2.3- Statistical Analysis

The results were presented as mean and standard deviation for the continuous variables and, frequency and proportion for categorical variables. Statistical analysis was performed using the SPSS 22.0 software.

For the proofing of existence of dependency relationships between categorical variables, the chi-square test was used. The t-Student or Mann-Whitney tests were used to compare continuous variables between two independent groups, as in the case of comparisons between males and females.

Wilcoxon test was used for paired variables, such as the comparison between results in pairs of WHOQOL-BREF domains. Kruskal-Wallis test was used to compare three or more independent groups, such as in different age groups and, in the presence of significant differences, Bonferroni correction or procedure was used.

Spearman test was used to verify the correlation between the variables related to the results of each of the domains of the questionnaire. All variables were tested to find out whether they had a normal distribution by Kolmogorov-Smirnov test, in order to decide which of the tests described above would be used. In the present study, a level of statistical significance of less than or equal to 5% was adopted.

### 3. Results

During the period of study, a total of 353 patients who sought treatment by acupuncture at the general outpatient clinic of Faculdade EBRAMEC were analyzed, including 111 (31.4%) male and 242 (68.6%) female. The proportion of female patients was higher than that of male patients (chi-square adherence test with  $p < 0.001$ ).

Among the 353 patients, the mean age was 52.9 ( $\pm 17.8$ ) with a very wide age variation with a minimum of 7 and a maximum of 90 years of age, as shown in Table 1.

Table 1. Data on age group of participants

| Age Group                    | N   | %     |
|------------------------------|-----|-------|
| < 20 years                   | 12  | 3.40  |
| $\geq 20$ years e < 30 years | 26  | 7.37  |
| $\geq 30$ years e < 45 years | 73  | 20.68 |
| $\geq 45$ years e < 65 years | 141 | 39.94 |
| $\geq 65$ years              | 101 | 28.61 |
| Total                        | 353 | 100   |

The indexes of general Quality of Life and each of the domains of WHOQOL-BREF, for the 353 individuals are shown in Table 2.

Table 2. Indexes of General Quality of Life and each of the domains of patients seeking for acupuncture treatment

| WHOQOL<br>Index         | Domain      |
|-------------------------|-------------|
| General Quality of Life | 59 (13,5)   |
| Physical Domain         | 54,1 (18,2) |
| Psychological Domain    | 61,5 (17,2) |
| Social Domain           | 62,0 (18,6) |
| Environment Domain      | 58,3 (14,1) |

Mean (standard deviation)

The results of each WHOQOL-BREF domain and the general Quality of Life in relation to male and female patients are shown in Table 3. Higher values were observed in males for physical and psychological domains and quality of life compared to female patients.

Table 3. Comparison of the values of each domain and quality of life in relation to gender

| WHOQOL-BREF     | Male        | Female      | P value |
|-----------------|-------------|-------------|---------|
| Physical        | 56.7 (16.8) | 52.9 (18.7) | 0.042   |
| Psychological   | 66.9 (16.5) | 59.0 (17.0) | < 0.001 |
| Social          | 63.7 (20.9) | 61.3 (17.5) | 0.084   |
| Environment     | 59.7 (13.4) | 57.7 (14.4) | 0.186   |
| Quality of Life | 61.8 (13.6) | 57.7 (13.2) | 0.004   |

Statistical test: Mann-Whitney

Regarding the different age groups, it was only observed a difference in relation to the Psychological Domain. Age group  $\geq 30$  years and  $<45$  years showed lower values than age group  $\geq 45$  years and  $<65$  years ( $p < 0.001$ ) and less than age group  $\geq 65$  years ( $p = 0.030$ ).

Physical Domain values were lower than all other domains (with  $p < 0.001$  for all comparisons). No differences were identified between the values of Psychological and Social Domains ( $p = 0.494$ ). And, Environment Domain presented lower values than Psychological and Social Domains (with  $p < 0.001$  for each of the two comparisons).

All relationships between the domains showed positive correlations, indicating that patients with higher values in one of the domains also present higher values in the other domains and in the Quality of Life (Table 4).

Table 4. Correlation between Domains and Quality of life of participants.

| WHOQOL-BREF   | Psychological | Social | Environment | Quality of Life |
|---------------|---------------|--------|-------------|-----------------|
| Physical      | 0.567         | 0.351  | 0.477       | 0.759           |
| Psychological |               | 0.562  | 0.573       | 0.857           |
| Social        |               |        | 0.428       | 0.750           |
| Environment   |               |        |             | 0.752           |

Statistical test: Spearman correlation

### 3.1- Comparison with normative data for Brazil

For comparison with normative values for the Brazilian population [27], an adjustment was made to analyze only patients with similar age groups, totaling 240 (68% of patients), considering ages between 20 to 64 years. In this analysis, patients who sought for acupuncture treatment (Acupuncture Group) had a significantly lower mean

value in all Domains, except for the analysis of the Environmental Domain, compared to the normative sample (Group Brazil) (Table 5).

Table 5. Comparison of each domain values between reference of the Brazilian population and people seeking for acupuncture treatment.

| WHOQOL-BREF          | Brazil      | Acupuncture | P value |
|----------------------|-------------|-------------|---------|
| <b>Physical</b>      | 58.9 (10.5) | 55.5 (18.3) | 0.007   |
| <b>Psychological</b> | 65.9 (10.8) | 61.0 (17.1) | < 0.001 |
| <b>Social</b>        | 76.2 (18.8) | 61.5 (19.2) | < 0.001 |
| <b>Environment</b>   | 59.9 (14.9) | 58.1 (14.5) | 0.097   |

Statistical test: Mann-Whitney

For male patients, only the Social Domain of those who sought for acupuncture treatment had a lower mean value than the normative data of Brazilian population ( $p = 0.002$ ). For female patients, the mean value of all domains, except for the Environment Domain, was lower than data of Brazilian population.

Regarding the different age groups, it was possible to identify that for age group of 20-29 years, the Psychological and Social Domains presented lower mean values; for age group of 30-44 years, only the Physical Domain did not present a lower mean value; and for age group 45-64, only the Social Domain had a lower mean value compared to the normative values [27] (Figure 1).

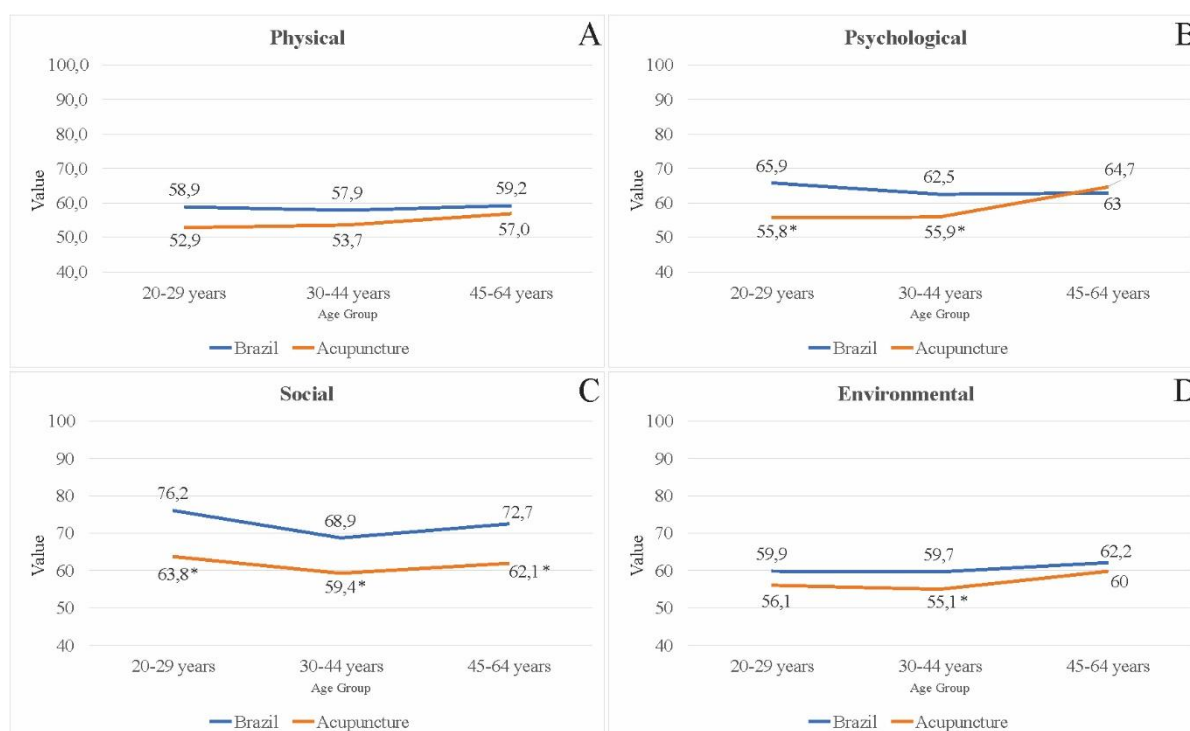

Figure 1 - Curves of the WHOQOL-BREF domains, according to age group, in Brazil and Acupuncture Groups. A-Physical; B-Psychological; C-Social; D- Environmental.

This Figure depicts all domains and in all age groups analyzed, the Quality of Life values of the normative data of the Brazilian population were higher than those presented by patients in

search of acupuncture, with the exception of data for the psychological domain in the age group between 45 and 64 years old.

### 3.2- Comparison with data from an older population in Porto Alegre.

For comparison with an elderly population, it was used data from patients over 60 years old from the Porto Alegre region. 130 (36.83% of the total patients) were selected from the Acupuncture group, adjusting the analysis by age group. It was possible to observe that in all domains, the mean values of individuals who sought care for Acupuncture were lower than the means of individuals in the Porto Alegre region [28] (Table 6).

Table 6. Comparison of the domains values of people who sought for acupuncture treatment and reference values for elderly people.

| WHOQOL-BREF   | Porto Alegre  | Acupuncture   | P value |
|---------------|---------------|---------------|---------|
| Physical      | 73.84 (14.60) | 52.86 (17.02) | < 0.001 |
| Psychological | 73.71 (12.72) | 64.87 (15.09) | < 0.001 |
| Social        | 73.46 (14.85) | 63.78 (16.43) | < 0.001 |
| Environment   | 71.94 (12.60) | 58.68 (13.02) | < 0.001 |

Statistical test: Mann-Whitney

## 4. Discussion

The present study offers reference values for the Quality of Life of people seeking for acupuncture treatment based on the population of São Paulo, southeastern Brazil, indicating that the Quality of Life indexes and the respective domains, with the exception of environmental domain, were lower compared to the normative data of the population of Brazil.

The largest age group with patients who sought for acupuncture treatment was between 45 and 65 years old (40%), which is very similar to a study carried out in Santa Catarina [30], where most patients (65%) were from age group of 45 years and older. It is also interesting to point that this is exactly the age group which presented a quality of life value, specifically in the psychological domain, higher in the Acupuncture Group in relation to the normative data for the Brazilian population. This data can be analyzed by the increasing incidence of common mental disorders in older patients [31,32].

According to the principles of Chinese Medicine, the signs and symptoms presented by older patients tend to be related to the concept of Deficiency Syndromes [33], which could be related to the fact that in the comparison for people over 60, data from people seeking for acupuncture treatment were lower in all WHOQOL-BREF domains.

Our study identified that male patients had superior general quality of life indexes including the respective domains in relation to female patients, as also observed in other previous studies from different countries [34,35].

Physical domain presented significantly lower values than all other domains, which is in line with the data presented in China [36,37] and Brazil [38], which presented 58% and 60%, respectively, of the total acupuncture patients analyzed with musculoskeletal complaints, which reflects on a lower physical domain quality of life, as also verified in other studies [39-41]

Acupuncture, as part of Chinese Medicine, has thousands of years of practice, however scientific studies are much more recent, starting in the 18th century with some simple studies, growing into seeking to evaluate the real effectiveness of acupuncture and its physiological and underlying biological factors [42].

Researchers indicate that clinical studies with Acupuncture still need to improve so that the results of basic research can actually be transformed into clinical results [43]. It can be considered that much of this situation is due



to the fact that nowadays, what is considered the “gold standard” for evaluating the clinical features of treatments are double blinded, randomized, controlled trials.

Researchers from Chengdu [44], China, describe that in relation to the assessment of clinical results from Acupuncture, research should focus on more reliable measurements, such as symptom and function scales, in addition to assessing quality of life.

As highlighted by Scognamiglio-Szabo (2011) [45], Acupuncture theory suggests that health is dependent on psycho-neuro-endocrine functions, under the influence of the genetic code and extrinsic factors such as nutrition, lifestyle, climate, quality of the environment, among others, which also can be seen as understanding the effects of Acupuncture through the use of appropriate instruments for the assessment of Quality of Life, which contemplates different aspects of the human being.

One of the limitations of the study may be in relation to the disproportionate sample in relation to the gender with 111 (31.4%) male and 242 (68.6%) female, which can be understood by historical-cultural issues where men are seen as invulnerable and end up not seeking proper health care, as with women [46,47].

The data in this study provide a new view on people who seek for acupuncture treatments and allow future studies to have a reference for comparison in relation to different groups of people who seek different therapeutic approaches, such as complementary, alternative or integrative practices, as a reference value.

## 5. Conclusions

Data from the present study demonstrated that the mean quality of life of people seeking for acupuncture treatment is lower than that presented in a reference study with a Brazilian population. Thus, this study provides, for the first time, quality of life reference values, measured by WHOQOL-bref instrument, for patients seeking for acupuncture treatment at an institution in the city of São Paulo, southeastern Brazil.

These data can be used as a reference for future studies through comparison with patients seeking for other therapeutic approaches, Western or Eastern, or even as a possible normative reference value for research comparing pre and post therapeutic intervention.

**Funding:** This research received no external funding

**Acknowledgments:** We would like to acknowledge the support from staff of Faculdade EBRAMEC on providing the raw data from the patients.

**Conflicts of Interest:** The authors declare no conflict of interest.

## References

1. NASCIMENTO, Marilene Cabral do; BARROS, Nelson Filice de; NOGUEIRA, Maria Inês e LUZ, Madel Therezinha. The medical rationale category and a new epistemology in health. *Ciênc. saúde coletiva* [online]. 2013, vol.18, n.12, pp.3595-3604. Doi: 10.1590/S1413-81232013001200016.
2. Kaptchuk TJ. *The Web That Has No Weaver: Understanding Chinese Medicine*. 2nd ed. Lincolnwood, IL: Contemporary Books (McGraw-Hill); 2000.
3. Lu AP, Jia HW, Xiao C, Lu QP. Theory of traditional Chinese medicine and therapeutic method of diseases. *World J Gastroenterol*. 2004 Jul 1;10(13):1854-6. Review.
4. Freeman J. Towards a definition of holism. *Br J Gen Pract*. 2005;55:154-5
5. Lu AP, Jia HW, Xiao C, Lu QP. Theory of traditional Chinese medicine and therapeutic method of diseases. *World J Gastroenterol*. 2004;10:1854-6. Review.
6. BRAZIL. Ministry of Health. National Policy for Complementary and Integrative Practices. Ordinance n. 971. Brasília: Brazilian Federal Register, n.84, section I; 2006. p. 20-4
7. de Moraes Mello Boccolini P, Siqueira Boccolini C. Prevalence of complementary and alternative medicine (CAM) use in Brazil. *BMC Complement Med Ther*. 2020;20(1):51. Published 2020 Feb 13. doi:10.1186/s12906-020-2842-8
8. Vakharia PP, Cella D, Silverberg JI. Patient-reported outcomes and quality of life measures in atopic dermatitis. *Clin Dermatol*. 2018 Sep - Oct;36(5):616-630. doi: 10.1016/j.clindermatol.2018.05.011. Epub 2018 Jun 1.

9. Chernyshov P, V: The Evolution of Quality of Life Assessment and Use in Dermatology. *Dermatology* 2019;235:167-174. doi: 10.1159/000496923
10. Louredo, Amanda Braga de, Leite, Ana Luiza Coelho, Salerno, Gisela Rosa Franco, Fernandes, Marcelo, & Blascovi-Assis, Silvana. Instruments to assess quality of life in patients with heart failure. *Fisioterapia em Movimento*, 2015; 28(4), 851-858. <https://doi.org/10.1590/0103-5150.028.004.AR03>
11. Bulpitt CJ. Quality of life as an outcome measure. *Postgrad Med J*. 1997;73(864):613-616. doi:10.1136/pgmj.73.864.613
12. Guyatt GH, Feeny DH, Patrick DL. Measuring health-related quality of life. *Ann Intern Med* 1993; 118(8):622-629.
13. Fan L, Fu W, Chen Z, et al. Curative effect of acupuncture on quality of life in patient with depression: a clinical randomized single-blind placebo-controlled study. *J Tradit Chin Med*. 2016;36(2):151-159. doi:10.1016/s0254-6272(16)30021-8
14. Cheng FK. The Effectiveness of Acupuncture on Sleep Disorders: A Narrative Review. *Altern Ther Health Med*. 2020;26(1):26-48.
15. Chen Y, He E, Tian H, Zhao J. Impact of Electroacupuncture on the Life Quality in Patients of Female Mixed Urinary Incontinence. *Zhongguo Zhen Jiu*. 2016;36(3):256-258.
16. Mooventhan A, Nivethitha L. Effects of acupuncture and massage on pain, quality of sleep and health related quality of life in patient with systemic lupus erythematosus. *J Ayurveda Integr Med*. 2014;5(3):186-189. doi:10.4103/0975-9476.140484
17. Calcagni N, Gana K, Quintard B. A systematic review of complementary and alternative medicine in oncology: Psychological and physical effects of manipulative and body-based practices. *PLoS One*. 2019;14(10):e0223564. Published 2019 Oct 17. doi:10.1371/journal.pone.0223564
18. Singh A, Zhao K. Treatment of Insomnia with Traditional Chinese Herbal Medicine. *Int Rev Neurobiol*. 2017;135:97-115. doi:10.1016/bs.irm.2017.02.006
19. The World Health Organization Quality of Life assessment (WHOQOL): position paper from the World Health Organization. *Soc Sci Med*. 1995;41(10):1403-1409. doi:10.1016/0277-9536(95)00112-k
20. Detmar, S. B., Muller, M. J., Schornagel, J. H., Wever, L. D. V., & Aaronson, N. K. (2002). Health-related quality-of-life assessments and patient-physician communication: A randomized controlled trial. *JAMA*, 288(23), 3027-3034.
21. Velikova, G., Keding, A., Harley, C., Cocks, K., Booth, L., Smith, A. B., et al. (2010). Patients report improvements in continuity of care when quality of life assessments are used routinely in oncology practice: Secondary outcomes of a randomized controlled trial. *European Journal of Cancer*, 46(13), 2381-2388.
22. Marshall, S., Haywood, K. L., & Fitzpatrick, R. (2006). Impact of patient-reported outcome measures on routine practice: A structured review. *Journal of Evaluation in Clinical Practice*, 12, 559-568.
23. Llewellyn AM, Skevington SM. Evaluating a new methodology for providing individualized feedback in healthcare on quality of life and its importance, using the WHOQOL-BREF in a community population. *Qual Life Res*. 2016 Mar;25(3):605-14. doi: 10.1007/s11136-015-1132-2. Epub 2015 Sep 14.
24. Fleck MP, Louzada S, Xavier M, Chachamovich E, Vieira G, Santos L, Pinzon V. Application of the Portuguese version of the instrument for the assessment of quality of life of the World Health Organization (WHOQOL-100). *Rev Saude Publica*. 1999 Apr;33(2):198-205
25. The WHOQOL Group. Development of the World Health Organization WHOQOL-bref. *Quality of Life Assessment* 1998. *Psychol Med*. 1998;28:551-8.
26. Skevington SM, Lotfy M, O'Connell KA; WHOQOL Group. The World Health Organization's WHOQOL-BREF quality of life assessment: psychometric properties and results of the international field trial. A report from the WHOQOL group. *Qual Life Res*. 2004;13(2):299-310. doi:10.1023/B:QURE.0000018486.91360.00
27. Cruz LN, Polanczyk CA, Camey SA, Hoffmann JF, Fleck MP. Quality of life in Brazil: normative values for the WHOQOL-bref in a southern general population sample. *Qual Life Res*. 2011 Sep;20(7):1123-9. doi: 10.1007/s11136-011-9845-3.
28. Chachamovich E, Trentini C, Fleck MP. Assessment of the psychometric performance of the WHOQOL-BREF instrument in a sample of Brazilian older adults. *Int Psychogeriatr*. 2007 Aug;19(4):635-46.
29. Fleck, M. P., Louzada, S., Xavier, M., Chachamovich, E., Vieira, G., Santos, L., et al. (2000). Application of the Portuguese version of the abbreviated instrument of quality life WHOQOLbref. *Revista de Saude Publica*, 34(2), 178-183.
30. Guimarães SB, da Silva AH, Braga JM. Patterns of acupuncture practice and acupoint usage in Brazil: the Fortaleza experience. *J Acupunct Meridian Stud*. 2008;1(2):149-152. doi:10.1016/S2005-2901(09)60036-4
31. McCombe G, Fogarty F, Swan D, et al. Identified mental disorders in older adults in primary care: A cross-sectional database study. *Eur J Gen Pract*. 2018;24(1):84-91. doi:10.1080/13814788.2017.1402884
32. Dos Santos GBV, Goldbaum M, César CLG, Gianini RJ. Care seeking behavior of people with common mental disorders in São Paulo-Brazil. *Int J Ment Health Syst*. 2020;14:36. Published 2020 May 24. doi:10.1186/s13033-020-00369-4
33. Chan CWC, Chau PH, Leung AYM, et al. Acupressure for frail older people in community dwellings-a randomised controlled trial. *Age Ageing*. 2017;46(6):957-964. doi:10.1093/ageing/afx050
34. Pucci G, Reis RS, Rech CR, Hallal PC. Quality of life and physical activity among adults: population-based study in Brazilian adults. *Qual Life Res*. 2012;21(9):1537-1543. doi:10.1007/s11136-011-0083-5



35. Gobbens RJ, Remmen R. The effects of sociodemographic factors on quality of life among people aged 50 years or older are not unequivocal: comparing SF-12, WHOQOL-BREF, and WHOQOL-OLD. *Clin Interv Aging*. 2019;14:231-239. doi:10.2147/CIA.S189560
36. Xu X. Acupuncture in an outpatient clinic in China: a comparison with the use of acupuncture in North America. *South Med J*. 2001;94(8):813-816.
37. Napadow V, Kaptchuk TJ. Patient characteristics for outpatient acupuncture in Beijing, China. *J Altern Complement Med*. 2004;10(3):565-572. doi:10.1089/1075553041323849
38. Guimarães SB. Acupuncture in an outpatient clinic in Fortaleza, Brazil: patients' characteristics and prevailing main complaints. *J Altern Complement Med*. 2007;13(3):308-310. doi:10.1089/acm.2006.6340
39. ALMEIDA, Flavia Cesarino et al. Correlation between neuropathic pain and quality of life. *BrJP*. 2018, vol.1, n.4, pp.349-353.
40. Skevington SM. Investigating the relationship between pain and discomfort and quality of life, using the WHOQOL. *Pain*. 1998;76(3):395-406. doi:10.1016/s0304-3959(98)00072-4
41. McCombe G, Fogarty F, Swan D, et al. Identified mental disorders in older adults in primary care: A cross-sectional database study. *Eur J Gen Pract*. 2018;24(1):84-91. doi:10.1080/13814788.2017.1402884
42. Zhuang Y, Xing JJ, Li J, Zeng BY, Liang FR. History of acupuncture research. *Int Rev Neurobiol*. 2013;111:1-23. doi:10.1016/B978-0-12-411545-3.00001-8
43. Langevin HM, Wayne PM, Macpherson H, et al. Paradoxes in acupuncture research: strategies for moving forward. *Evid Based Complement Alternat Med*. 2011;2011:180805. doi:10.1155/2011/180805
44. Zhuang Y, Xing JJ, Li J, Zeng BY, Liang FR. History of acupuncture research. *Int Rev Neurobiol*. 2013;111:1-23. doi:10.1016/B978-0-12-411545-3.00001-8
45. SCOGNAMILLO-SZABO, Márcia Valéria Rizzo and BECHARA, Gervásio Henrique. Acupuncture: history, basic principles and its use in Veterinary Medicine. *Cienc. Rural* [online]. 2010, vol.40, n.2, pp.461-470. Epub Jan 15, 2010. IDoi: 10.1590/S0103-84782010005000004.
46. Peate I. Men's attitudes towards health and the implications for nursing care. *Br J Nurs*. 2004;13(9):540-545. doi:10.12968/bjon.2004.13.9.12967
47. OLIVEIRA, Max Moura de; DAHER, Donizete Vago; SILVA, Jorge Luiz Lima da and ANDRADE, Silvânia Suely Caribé de Araújo. Men's health in question: seeking assistance in primary health care. *Ciênc. saúde coletiva*. 2015, vol.20, n.1, pp.273-278.

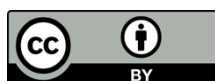

© 2020 by the authors. Submitted for possible open access publication under the terms and conditions of the Creative Commons Attribution (CC BY) license (<http://creativecommons.org/licenses/by/4.0/>).
